# Supplementary material for: Phenotype loss is associated with widespread divergence of the gene regulatory landscape in evolution
Source: PubMed Central journal article supplement (PMC6226452; doi:10.1038/s41467-018-07122-z), 2018-11-09
Supplement: 41467_2018_7122_MOESM3_ESM.pdf [file 41467_2018_7122_MOESM3_ESM.pdf]

## Supplementary Data legends

### **Data 1**

Overview of the generated sequencing data

### **Data 2**

Comparison of assembly completeness

### **Data 3**

Species and assemblies used for the limb study

### **Data 4**

Tegu lizard genomic coordinates and additional information of all 5,439 snake-diverged CNEs.

### **Data 5**

Tegu lizard genomic coordinates of the regulatory domains of 439 genes involved in limb development.

### **Data 6**

Tegu lizard genomic coordinates of the regulatory domains of 439 genes involved in limb development.

### **Data 7**

Tegu lizard genomic coordinates of tegu limb-specific ATAC-seq peaks.

### **Data 8**

Enrichment of snake-diverged CNEs with regulatory datasets.

### **Data 9**

Mouse and Tegu lizard genomic coordinates of experimentally validated limb enhancers.

### **Data 10**

Enrichment of snake-diverged CNEs with eye regulatory datasets.

### **Data 11**

Species and assemblies used for the eye study

### **Data 12**

Mouse mm10 genomic coordinates and additional information of all 9,364 CNEs diverged in the vision-impaired subterranean mammals.

### **Data 13**

Mouse mm10 genomic promoter coordinates of 64 diverged eye-related genes.

### **Data 14**

Enrichment of CNEs diverged in vision-impaired subterranean mammals with all MGI phenotypes.

### **Data 15**

Enrichment of CNEs diverged in vision-impaired subterranean mammals with MGI phenotypes, after excluding the 64 diverged eye-related genes.

### **Data 16**

Mouse mm10 genomic coordinates of eye-specific ATAC-seq peaks.

### **Data 17**

Enrichment of CNEs diverged in vision-impaired subterranean mammals with regulatory datasets.

### **Data 18**

Overlap between conserved and non-conserved limb regulatory elements with genital regulatory elements.

**Data 19**

Transcription factor motif clusters.

**Data 20**

List of limb-related transcription factors and their respective binding motifs.

**Data 21**

List of eye-related transcription factors and their respective binding motifs.

**Data 22**

CNE sequences that were tested in luciferase assays.

**Data 23**

List of softwares, versions, and corresponding parameters used for all analyses.
